# Supplementary material for: Modeling the Significance of Motivation on Job Satisfaction and Performance Among the Academicians: The Use of Hybrid Structural Equation Modeling-Artificial Neural Network Analysis
Source: Frontiers journal article supplement (doi:10.3389/fpsyg.2022.935822), 2022-06-20
Supplement: Data_Sheet_2.pdf [file Data_Sheet_2.pdf]

## Supplementary Appendix 1. Study Population

| No | Selection of respondents      | No. of PHEIs |
|----|-------------------------------|--------------|
| 1  | Universities (PHEIs)          | 51           |
| 2  | International branch campuses | 10           |
| 3  | College universities          | 38           |
| 4  | Colleges                      | 349          |
|    | Total Population Size         | 448          |

**Note:** PHEI - Private Higher Educational Institutions

## Supplementary Appendix 2. The selection of universities for this study

| Zone         | Name of PHEI                                                                    | State                            |
|--------------|---------------------------------------------------------------------------------|----------------------------------|
| North        | Universiti Teknologi Petronas (UTP)                                             | Perak                            |
|              | Universiti Tunku Abdul Rahman (UTAR)                                            |                                  |
|              | Universiti Sultan Azlan Shah (USAS)                                             |                                  |
|              | Quest International University                                                  |                                  |
|              | Universiti Terbuka Wawasan                                                      | Penang                           |
|              | AIMST University                                                                | Kedah                            |
|              | Universiti Kuala Lumpur Malaysian Spanish Institute (UNIKL- MSI)                |                                  |
| Central      | Universiti Antarabangsa AlBukhary (AIU)                                         | Selangor                         |
|              | Multimedia University (MMU), Kampus Cyberjaya                                   |                                  |
|              | Asia Pacific University of Technology & Innovation (Asia Pasific UTI)           |                                  |
|              | UNITAR International University                                                 |                                  |
|              | Universiti Selangor (UNISEL), Kampus Shah Alam                                  |                                  |
|              | Malaysia University of Sceince and Technology (MUST)                            |                                  |
|              | University Malaysia of Computer Science and Engineering                         |                                  |
|              | Al-Madinah International University (MEDIU)                                     |                                  |
|              | City University                                                                 |                                  |
|              | Universiti Teknologi Kreatif Limkokwing (LUCT)                                  |                                  |
|              | Asia e University (AeU)                                                         |                                  |
|              | International Centre for Education in Islamic Finance (INCEIF)                  |                                  |
|              | Management and Science University (MSU)                                         |                                  |
|              | Taylor's University                                                             |                                  |
|              | Manipal International University (MIU), Malaysia                                |                                  |
|              | Sunway University                                                               |                                  |
|              | Perdana University                                                              |                                  |
|              | Universiti HELP                                                                 |                                  |
|              | Universiti SEGi (SEGi University)                                               |                                  |
|              | Binary University of Management & Entrepreneurship (BUME)                       |                                  |
|              | Malaysia Institute For Supply Chain Innovation (MISI)                           |                                  |
|              | Universiti Metropolitan Asia (Asia Metropolitan University)                     |                                  |
|              | Universiti Tun Abdul Razak (UNIRAZAK)                                           |                                  |
|              | Universiti Terbuka Malaysia (UNITEM) (Open University Malaysia (OUM)            | Wilayah Persekutuan Kuala Lumpur |
|              | Universiti Kuala Lumpur (UNIKL)                                                 |                                  |
|              | Universiti UCSI (UCSI University)                                               |                                  |
|              | Global NXT University                                                           |                                  |
|              | Universiti Infrastruktur Kuala Lumpur                                           |                                  |
|              | MAHSA University                                                                |                                  |
|              | International University of Malaya Wales (IUMW)                                 |                                  |
|              | Universiti Kuala Lumpur Malaysian France Institute (UNIKL- MFI)                 |                                  |
|              | Universiti Kuala Lumpur Malaysian Institute of Aviation Technology (UNIKL-MIAT) |                                  |
|              | Universiti Kuala Lumpur British Malaysia Institute (Unikl-BMI)                  |                                  |
|              | Asia School Of Business (ASB)                                                   |                                  |
|              | Meritus University                                                              |                                  |
| South        | Universiti Tenaga Nasional (UNITEN), Kampus Putrajaya                           | Wilayah Persekutuan Putrajaya    |
|              | Raffles University Iskandar Malaysia                                            | Johor                            |
|              | Multimedia University (MMU), Kampus Melaka                                      | Melaka                           |
|              | Sekolah Klinikal Universiti Perubatan Antarabangsa (IMU)                        | Negeri Sembilan                  |
|              | INTI International University                                                   |                                  |
| East<br>Cost | Universiti Nilai                                                                |                                  |
|              | Universiti Tenaga Nasional (UNITEN), Kampus Muadzam Shah                        | Pahang                           |
|              | DRB-HICOM University Of Automotive Malaysia                                     |                                  |
|              | Universiti UCSI (UCSI University), Kampus                                       | Terengganu                       |

### Supplementary Appendix 3. Survey Instrument

| Code | Items                                                                                                     | Sources                                                              |
|------|-----------------------------------------------------------------------------------------------------------|----------------------------------------------------------------------|
| FR1  | I am satisfied with my present financial rewards                                                          | (Chiang & (Shawn) Jang, 2008; Teclenmichael Tessema & Soeters, 2006) |
| FR2  | I am satisfied with my annual financial rewards                                                           |                                                                      |
| FR3  | My institution sets clear criteria for the overall reward system                                          |                                                                      |
| FR4  | There is a well-established appraisal system in my institution                                            |                                                                      |
| FR5  | My institution offers me an attractive compensation system                                                |                                                                      |
| FR6  | The presence of financial reward reflects my current living standard                                      |                                                                      |
| PR1  | Promotions are given based on my performance outcome                                                      | (Munyengabe et al., 2017b)                                           |
| PR2  | The way promotions are given motivates me to work hard.                                                   |                                                                      |
| PR3  | Incentives given are relevant compared to the work I do.                                                  |                                                                      |
| PR4  | Promotions in my institution are given based on merit to the most qualified                               |                                                                      |
| PR5  | My superior is fair in recommending promotions                                                            |                                                                      |
| PR6  | The promotion system is flexible in terms of weight given to teaching, research, and service length.      |                                                                      |
| PA1  | Performance appraisal process is conducted in a regular periodic time (each semester)                     | (Al-Ashqar, 2017)                                                    |
| PA2  | The performance appraisal system helps me to develop and improve my performance                           |                                                                      |
| PA3  | The students' evaluation process provides feedback on my teaching methods                                 |                                                                      |
| PA4  | Performance appraisal helps me to know the strengths and weaknesses of my performance                     |                                                                      |
| PA5  | The performance appraisal process is characterized by the flexibility to face the changes in my teaching. |                                                                      |
| PA6  | Research, publication, conference participation included in my performance appraisal process.             |                                                                      |
| CE1  | I have self-confident in my classroom management                                                          | (Munyengabe et al., 2017b)                                           |
| CE2  | The number of students doesn't affect my teaching activities in class                                     |                                                                      |
| CE3  | I'm satisfied with the tidiness of my classroom                                                           |                                                                      |
| CE4  | Student's performance motivates my lecture activities                                                     |                                                                      |
| CC1  | The way the code of conduct is set doesn't interrupt me                                                   | (Munyengabe et al., 2017b)                                           |
| CC2  | I always obey the rules and regulations set by my institution                                             |                                                                      |
| CC3  | I seek for colleague's permission when using their teaching material                                      |                                                                      |
| CC4  | There is no injustice in handling issues related to my job performance                                    |                                                                      |
| AT1  | I am free to decide how to go about getting my work done                                                  | (Johari et al., 2018)                                                |
| AT2  | I'm able to choose the way to go about my work in my team                                                 |                                                                      |
| AT3  | I am able to decide for myself what my objective are.                                                     |                                                                      |
| AT4  | I am free to choose how to carry out my work                                                              |                                                                      |
| AT5  | I have some control over what I suppose to do to achieve my goal                                          |                                                                      |
| AT6  | I have the authority to decide on when to do particular activities as a part of my work                   |                                                                      |
| JS1  | I am satisfied with my current salary scheme                                                              | (Munyengabe et al., 2017b)                                           |
| JS2  | I am satisfied with my career prospect in this institution                                                |                                                                      |
| JS3  | I am satisfied with my job permanency in this institution                                                 |                                                                      |
| JS4  | I am satisfied with the way my superior give feedback during appraisals.                                  |                                                                      |
| JS5  | I am satisfied with the classroom which is equipped with all necessities to favour teaching activities.   |                                                                      |
| JS6  | I am satisfied with my work because there is a clear policy towards educational aspirations.              |                                                                      |
| JS7  | I am satisfied with the present social status as an academician.                                          |                                                                      |
| SE1  | I feel confident in doing research                                                                        | (Sharp et al., 2013)                                                 |
| SE2  | I feel confident in journal publications                                                                  |                                                                      |
| SE3  | I feel confident in delivering lecturing duties                                                           |                                                                      |
| SE4  | I feel confident updating lecture material constantly                                                     |                                                                      |
| SE5  | I feel confident in facilitating students' participation in class                                         |                                                                      |
| SE6  | I feel confident in providing feedback on students' assessment                                            |                                                                      |
| JP1  | I adequately accomplish the tasks given on time                                                           | (Molefe, 2010; Sukirno & Siengthai, 2011)                            |
| JP2  | I fulfill the responsibilities specified in my job description                                            |                                                                      |
| JP3  | I engaged in activities that will directly affect my job performance evaluation                           |                                                                      |
| JP4  | I provide an alternative solution for the problem encountered by the institution                          |                                                                      |
| JP5  | I have relevant knowledge with my current position                                                        |                                                                      |
| JP6  | I respond appropriately to my superior's feedback on my job performance                                   |                                                                      |

**Note:** Financial Rewards (FR), Promotion (PR), Performance Appraisals (PA), Classroom Environment (CE), Code of Conduct (CC), Autonomy (AT), Job Satisfaction (LS), Self-Efficacy (SE), Job Performance (JP)

**Source:** Author's data analysis

# Supplementary Appendix 4. Loadings and Cross-Loading

| Code | FR    | PR    | PA    | CE    | CC    | AT    | JS    | SE    | JP    |
|------|-------|-------|-------|-------|-------|-------|-------|-------|-------|
| FR1  | 0.868 | 0.616 | 0.489 | 0.250 | 0.322 | 0.229 | 0.656 | 0.214 | 0.191 |
| FR2  | 0.851 | 0.625 | 0.505 | 0.209 | 0.333 | 0.222 | 0.635 | 0.184 | 0.192 |
| FR3  | 0.812 | 0.683 | 0.569 | 0.178 | 0.362 | 0.372 | 0.633 | 0.212 | 0.233 |
| FR4  | 0.788 | 0.648 | 0.565 | 0.180 | 0.304 | 0.370 | 0.573 | 0.226 | 0.279 |
| FR5  | 0.824 | 0.654 | 0.538 | 0.186 | 0.358 | 0.272 | 0.598 | 0.148 | 0.171 |
| FR6  | 0.720 | 0.469 | 0.427 | 0.268 | 0.305 | 0.339 | 0.510 | 0.245 | 0.229 |
| PR1  | 0.640 | 0.871 | 0.609 | 0.190 | 0.380 | 0.350 | 0.627 | 0.213 | 0.308 |
| PR2  | 0.627 | 0.871 | 0.624 | 0.209 | 0.365 | 0.342 | 0.640 | 0.195 | 0.277 |
| PR3  | 0.750 | 0.849 | 0.590 | 0.186 | 0.360 | 0.322 | 0.653 | 0.203 | 0.239 |
| PR4  | 0.641 | 0.855 | 0.599 | 0.195 | 0.333 | 0.361 | 0.634 | 0.185 | 0.241 |
| PR5  | 0.506 | 0.759 | 0.483 | 0.157 | 0.363 | 0.323 | 0.560 | 0.158 | 0.195 |
| PR6  | 0.631 | 0.787 | 0.516 | 0.097 | 0.289 | 0.264 | 0.599 | 0.097 | 0.119 |
| PA1  | 0.472 | 0.452 | 0.666 | 0.205 | 0.399 | 0.251 | 0.447 | 0.215 | 0.253 |
| PA2  | 0.625 | 0.691 | 0.849 | 0.196 | 0.356 | 0.378 | 0.617 | 0.183 | 0.273 |
| PA3  | 0.317 | 0.376 | 0.658 | 0.314 | 0.287 | 0.280 | 0.402 | 0.282 | 0.288 |
| PA4  | 0.506 | 0.552 | 0.862 | 0.253 | 0.292 | 0.355 | 0.540 | 0.266 | 0.289 |
| PA5  | 0.526 | 0.560 | 0.820 | 0.215 | 0.340 | 0.334 | 0.561 | 0.235 | 0.264 |
| PA6  | 0.351 | 0.388 | 0.580 | 0.229 | 0.300 | 0.283 | 0.427 | 0.266 | 0.238 |
| CE1  | 0.142 | 0.072 | 0.210 | 0.824 | 0.456 | 0.359 | 0.304 | 0.643 | 0.548 |
| CE2  | 0.167 | 0.126 | 0.159 | 0.681 | 0.359 | 0.271 | 0.278 | 0.358 | 0.342 |
| CE3  | 0.275 | 0.248 | 0.279 | 0.753 | 0.436 | 0.302 | 0.401 | 0.459 | 0.408 |
| CE4  | 0.184 | 0.177 | 0.257 | 0.675 | 0.404 | 0.343 | 0.244 | 0.456 | 0.459 |
| CC1  | 0.340 | 0.285 | 0.345 | 0.421 | 0.746 | 0.368 | 0.511 | 0.409 | 0.428 |
| CC2  | 0.234 | 0.248 | 0.227 | 0.492 | 0.759 | 0.324 | 0.377 | 0.498 | 0.459 |
| CC3  | 0.230 | 0.230 | 0.277 | 0.431 | 0.706 | 0.424 | 0.318 | 0.451 | 0.442 |
| CC4  | 0.374 | 0.459 | 0.427 | 0.298 | 0.697 | 0.376 | 0.490 | 0.239 | 0.303 |
| AT1  | 0.247 | 0.273 | 0.283 | 0.364 | 0.407 | 0.847 | 0.363 | 0.323 | 0.361 |
| AT2  | 0.302 | 0.313 | 0.364 | 0.370 | 0.448 | 0.837 | 0.402 | 0.393 | 0.418 |
| AT3  | 0.310 | 0.330 | 0.355 | 0.337 | 0.430 | 0.842 | 0.422 | 0.376 | 0.434 |
| AT4  | 0.292 | 0.309 | 0.338 | 0.336 | 0.401 | 0.876 | 0.366 | 0.300 | 0.380 |
| AT5  | 0.346 | 0.355 | 0.380 | 0.417 | 0.451 | 0.862 | 0.437 | 0.424 | 0.473 |
| AT6  | 0.360 | 0.406 | 0.424 | 0.387 | 0.456 | 0.842 | 0.460 | 0.408 | 0.450 |
| JS1  | 0.776 | 0.620 | 0.508 | 0.215 | 0.338 | 0.280 | 0.739 | 0.178 | 0.213 |
| JS2  | 0.653 | 0.683 | 0.584 | 0.258 | 0.463 | 0.389 | 0.826 | 0.250 | 0.293 |
| JS3  | 0.514 | 0.530 | 0.495 | 0.308 | 0.438 | 0.404 | 0.727 | 0.371 | 0.335 |
| JS4  | 0.521 | 0.611 | 0.584 | 0.260 | 0.489 | 0.359 | 0.745 | 0.291 | 0.324 |
| JS5  | 0.349 | 0.383 | 0.359 | 0.442 | 0.447 | 0.292 | 0.625 | 0.393 | 0.390 |
| JS6  | 0.584 | 0.591 | 0.547 | 0.335 | 0.481 | 0.419 | 0.827 | 0.294 | 0.329 |
| JS7  | 0.482 | 0.467 | 0.462 | 0.413 | 0.443 | 0.395 | 0.759 | 0.469 | 0.443 |
| SE1  | 0.225 | 0.206 | 0.260 | 0.393 | 0.355 | 0.325 | 0.338 | 0.704 | 0.512 |
| SE2  | 0.211 | 0.149 | 0.224 | 0.322 | 0.315 | 0.259 | 0.289 | 0.630 | 0.421 |
| SE3  | 0.162 | 0.136 | 0.219 | 0.652 | 0.507 | 0.358 | 0.343 | 0.904 | 0.708 |
| SE4  | 0.222 | 0.179 | 0.285 | 0.588 | 0.498 | 0.439 | 0.370 | 0.895 | 0.707 |
| SE5  | 0.231 | 0.203 | 0.304 | 0.660 | 0.523 | 0.388 | 0.388 | 0.887 | 0.713 |
| SE6  | 0.212 | 0.186 | 0.278 | 0.568 | 0.466 | 0.380 | 0.357 | 0.869 | 0.695 |
| JP1  | 0.195 | 0.186 | 0.226 | 0.486 | 0.479 | 0.404 | 0.325 | 0.678 | 0.864 |
| JP2  | 0.170 | 0.193 | 0.240 | 0.505 | 0.476 | 0.447 | 0.341 | 0.688 | 0.895 |
| JP3  | 0.247 | 0.268 | 0.370 | 0.490 | 0.470 | 0.411 | 0.393 | 0.583 | 0.824 |
| JP4  | 0.198 | 0.221 | 0.251 | 0.428 | 0.386 | 0.380 | 0.325 | 0.528 | 0.713 |
| JP5  | 0.222 | 0.216 | 0.301 | 0.608 | 0.507 | 0.431 | 0.373 | 0.756 | 0.866 |
| JP6  | 0.304 | 0.328 | 0.410 | 0.497 | 0.487 | 0.418 | 0.447 | 0.628 | 0.842 |

**Note:** Financial Rewards (FR), Promotion (PR), Performance Appraisals (PA), Classroom Environment (CE), Code of Conduct (CC), Autonomy (AT), Job Satisfaction (LS), Self-Efficacy (SE), Job Performance (JP)

**Source:** Author's data analysis
